## CORRECTION

# Correction: Effect of parental smoking on their children's urine cotinine level in Korea: A population-based study

Myung-Bae Park, Chhabi Lal Ranabhat

The following information is missing from the Funding statement: This work was supported by the National Research Foundation of Korea (NRF); the Korea government (MSIT) (No. NRF-2020R1C1C1007913).

## Reference

1. Park M-B, Ranabhat CL (2021) Effect of parental smoking on their children's urine cotinine level in Korea: A population-based study. PLoS ONE 16(4): e0248013. <https://doi.org/10.1371/journal.pone.0248013> PMID: 33857161

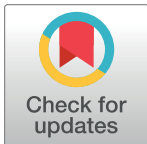

## OPEN ACCESS

**Citation:** Park M-B, Ranabhat CL (2021) Correction: Effect of parental smoking on their children's urine cotinine level in Korea: A population-based study. PLoS ONE 16(8): e0256412. <https://doi.org/10.1371/journal.pone.0256412>

**Published:** August 16, 2021

**Copyright:** © 2021 Park, Ranabhat. This is an open access article distributed under the terms of the [Creative Commons Attribution License](https://creativecommons.org/licenses/by/4.0/), which permits unrestricted use, distribution, and reproduction in any medium, provided the original author and source are credited.
